# Supplementary material for: Repetitive Transcranial Magnetic Stimulation for Post-Stroke Shoulder-Hand Syndrome: A Systematic Review and Meta-Analysis
Source: Research Square preprint supplement (doi:10.21203/rs.3.rs-8144851/v1), 2025-12-22
Supplement: Supplementary file 1 [file d19ab01ff405a7e252e09d36.docx]

| References | Sample  size (n)  (T, C) | Age (yrs)  (T, C) | Sex  (male/  female)  (T, C) | Course of  Disease (weeks)  (T, C) | rTMS Treatment  characteristics | Treatment  Duration (days) | Outcome  indicators |
| --- | --- | --- | --- | --- | --- | --- | --- |
| Liu et al.  (2021) | 50/50 | 60.2±10.8  62.7±10.7 | 56/44 | None | None | 14 | VAS,  FMA-UE |
| Liu et al.  (2020) | 70/70 | 56.33±4.1  56.14±3.9 | 71/69 | 3.54±1.34  3.29±1.35 | 10Hz,  1200 pulses | 90 | BI,  FMA-UE, |
| Wang et al.  (2024) | 30/30 | 61.24±7.62  62.90±6.45 | 31/29 | 4.34±0.60  4.17±0.51 | 1Hz | 28 | VAS,BI,  FMA-UE,  Edema |
| Wang et al.  (2024) | 51/51 | 61.82±7.56  62.47±7.98 | 53/49 | None | 1Hz,20pulses | 28 | VAS, BI,  FMA-UE, |
| Ge et al.  (2024) | 30/30 | 56.27±7.70  55.63±7.49 | 35/25 | 4.97±0.75  4.86±0.88 | 10Hz,80%RMT  1500 pulses | 28 | VAS, BI,  FMA-UE, Edema |
| Huang et al.  (2025) | 30/30 | 50.22±3.17/  51.03±3.12 | 30/30 | 4.17±0.68  4.10±0.65 | 1Hz,80%RMT | 30 | VAS, BI，  SHSS,  FMA-UE |
| Wu et al.  (2023) | 30/30 | 59.5±10.7  58.2±9.7 | 30/30 | 4.16±0.98/  4.07±0.73 | None | 24 | VAS, Edema，  FMA-UE |
| Wu et al.  (2021) | 28/28 | 59.4±10.7  58.5±9.5 | 30/26 | 4.00±2.87/  3.87±2.90 | None | 27 | VAS, NRS,  FMA-UE |
| Chen et al.  (2021) | 25/25 | 62.04±11.7l/  64.50±10.10 | 27/23 | 3.43±1.27/  3.66±1.39 | 10Hz,80%RMT,  1500 pulses | 30 | FMA-UE, BI |
| Liu et al.  (2024) | 40/40 | 62.00±8.94  62.77±8.49 | 42/38 | 6.67±3.42/  6.67±3.27 | 3Hz,80%RMT,  1200 pulses | 14 | FMA-UE,  SF-MPQ,  BI, SHSS |
| Liu et al.  (2021) | 30/30 | 54.27±7.38  56.13±8.17 | 30/30 | 3.07±1.11/  3.17±0.99 | 3Hz,80%RMT,  1200 pulses | 28 | FMA-UE,  SF-MPQ,  BI, Edema |
| Tian et al.  (2021) | 28/29 | 65.97±10.51  65.90±9.50 | 29/28 | 6.04±1.78/  6.37±1.64 | 5Hz,80%RMT,  750 pulses | 14 | FMA-UE, VAS，  PSQI, Edema |
|  |  |  |  |  |  |  |  |

T: Treatment Group; C: Control Group; rTMS: Repetitive Transcranial Magnetic Stimulation; VAS: Visual Analog Scale; FMA-UE: Fugl-Meyer Assessment; BI: Barthel Index; SHSS: Shoulder-Hand Syndrome Scale; SF-MPQ: Short-Form McGill Pain Questionnaire ;
