# Supplementary material for: Repetitive Transcranial Magnetic Stimulation for Post-Stroke Shoulder-Hand Syndrome: A Systematic Review and Meta-Analysis
Source: Research Square preprint supplement (doi:10.21203/rs.3.rs-8144851/v1), 2025-12-22
Supplement: Supplementary file 2 [file ef863919ad9dd4b481f24f57.docx]

**CNKI**

(卒中+中风+脑卒中+脑中风+急性卒中+脑血管意外+脑血管中风+急性脑血管意外+急性脑卒中)AND(经颅磁刺激)AND(反射性交感神经营养障碍+肩手综合征+痛性营养不良综合征+痛性营养障碍+RSD) 15 papers

**Wanfang**

（卒中 OR 中风 OR 脑卒中 OR 脑中风 OR 急性卒中 OR 脑血管意外 OR 脑血管中风 OR 急性脑血管意外 OR 急性脑卒中) and (经颅磁刺激) and (反射性交感神经营养障碍 OR 肩手综合征 OR 痛性营养不良综合征 OR 痛性营养障碍 OR RSD)

15 papers

**CSTJ**

（卒中 OR 中风 OR 脑卒中 OR 脑中风 OR 急性卒中 OR 脑血管意外 OR 脑血管中风 OR 急性脑血管意外 OR 急性脑卒中) and (经颅磁刺激) and (反射性交感神经营养障碍 OR 肩手综合征 OR 痛性营养不良综合征 OR 痛性营养障碍 OR RSD)

17 papers

**SinoMed**

（卒中 OR 中风 OR 脑卒中 OR 脑中风 OR 急性卒中 OR 脑血管意外 OR 脑血管中风 OR 急性脑血管意外 OR 急性脑卒中) and (经颅磁刺激) and (反射性交感神经营养障碍 OR 肩手综合征 OR 痛性营养不良综合征 OR 痛性营养障碍 OR RSD)

14 papers

**EMBASE**

('strokes' OR 'cerebrovascular accident'/exp OR 'cerebrovascular accident' OR 'cerebral stroke'/exp OR 'cerebral stroke' OR 'cerebral strokes') AND ('transcranial magnetic stimulation' OR 'magnetic stimulations' OR 'repetitive transcranial magnetic stimulation') AND ('shoulder-hand syndrome' OR 'dystrophies' OR 'reflex sympathetic dystrophies')

1 paper

**Cochrane Library**

(stroke):ti,ab,kw OR (cerebrovascular accident):ti,ab,kw AND (transcranial magnetic stimulation):ti,ab,kw OR (magnetic stimulations) :ti, ab,kw OR (repetitive transcranial magnetic stimulation) :ti, ab,kw AND (shoulder-hand syndrome OR dystrophies):ti, ab,kw OR (dystrophies) :ti, ab,kw OR (reflex sympathetic dystrophies) :ti, ab,kw

2 papers

**Web of Science**

**Strokes OR cerebrovascular accident OR cerebrovascular accident OR cerebral stroke OR cerebral stroke OR cerebral strokes** (Topic) and **transcranial magnetic stimulation OR magnetic stimulations OR repetitive transcranial magnetic stimulation** (Topic) and **shoulder-hand syndrome OR dystrophies OR reflex sympathetic dystrophies**(Topic)

2 papers

**PUBMED**

((Strokes OR cerebrovascular accident OR cerebrovascular accident OR cerebral stroke OR cerebral stroke OR cerebral strokes) AND (transcranial magnetic stimulation OR magnetic stimulations OR repetitive transcranial magnetic stimulation)) AND (shoulder-hand syndrome OR dystrophies OR reflex sympathetic dystrophies)

3 papers
